# Supplementary material
Source: PubMed Central journal article supplement (PMC2840272)
Supplement: 0907668107_pnas.0907668107_SI.pdf [file 0907668107_pnas.0907668107_SI.pdf]

# Supporting Information

Mitrete et al. 10.1073/pnas.0907668107

## SI Text

**Characterization of Bn-AFF-67.** We also created the AFF construct in which amino acids 67–110 of Bn were duplicated and appended to the N-terminus with an 18-residue linker ((GGS)<sub>5</sub>GTM). The IFLETS sequence (plus flanking residues as described in the text) was inserted between Lys66-Ser67 of F1 and the H102A mutation was introduced into F1. This construct is designated Bn-AFF-67. We additionally made F1 and F2 analogs. Bn-F1-67 consists of WT Bn with the IFLETS insertion and the H102A mutation. Bn-F2-67 is WT Bn circularly permuted at position 67 with the aforementioned peptide linking the original N- and C-termini.

CD spectra of Bn-F1-67 and Bn-F2-67 are similar to each other and to the CD spectra of Bn-F1 and Bn-F2 (Fig. S3). All species exhibit the 231 nm minimum which is characteristic of WT Bn. The stabilities of Bn-F1-67 ( $\Delta G^{\text{H}_2\text{O}} = 6.4 \pm 0.4$ ) and Bn-F2-67 ( $\Delta G^{\text{H}_2\text{O}} = 5.3 \pm 0.4$ ), as determined by equilibrium urea denaturation experiments, are very similar to those of Bn-F1 and Bn-F2, respectively (Table S1). Consequently, Bn-AFF-67 is expected to primarily adopt the F1 conformation. In support of that conclusion, the urea denaturation curve of Bn-AFF-67 is similar to that of Bn-F1-67 but not to that of Bn-F2-67 (Fig. S4). We further tested that hypothesis by introducing the W94K mutation into F1 of Bn-AFF-67. The W94K mutation destabilizes Bn-F1-67 by 1.6 kcal/mol (Table S1) and is therefore predicted to reverse the F2  $\rightleftharpoons$  F1 equilibrium to favor F2. Bn-AFF-67(K94) displays the 231 nm CD minimum (Fig. S3) and its urea denaturation curve matches that of Bn-F2-67 (Fig. S4). These data indicate that the W94K mutation induces the fold shift from F1 to F2.

The difference in stability between Bn-F1-67 and Bn-F2-67 ( $\Delta\Delta G^{\text{H}_2\text{O}} = 1.1$  kcal/mol) implies that a substantial percentage of Bn-AFF-67 molecules will adopt the catalytically active F2 conformation. To minimize RNase activity of full-length Bn-AFF-67, we introduced the W94K mutation into F2. This mutation is calculated to reduce the F2 population to <10% (Table 1). Thus, Bn-AFF-67(K94) is the stability-optimized form of the position 67 AFF construct, in the same way that Bn-AFF(P94) is the stability-optimized form of the position 93 construct.

An unexpected band (approximately 11 kDa) on SDS-PAGE was observed after cleaving Bn-AFF-67 with PR (Fig. S1). Subsequent mass spectral analysis identified this species to be the product of a second PR cleavage event at Trp94'. The sequence

surrounding positions 94' and 94 shares homology with known PR substrates (1) and both Bn-AFF-67 and Bn-AFF-67(K94') undergo miscleavage. The secondary site appears to be exposed in F2 of Bn-AFF-67 but is protected from proteolysis when Bn is folded: PR does not cleave at Trp94 in WT Bn or any isolated F1 or F2 analog. This result is consistent with mass spectrometry data (Fig. 5 of accompanying paper) that suggest that the duplicated tails are unstructured. PR does not miscleave Bn-AFF(P94') because Bn-AFF(P94') lacks the P4 substrate binding site and Pro does not appear to be a preferred amino acid at the P1 position (1). Fig. S1 shows that approximately half of Bn-AFF-67 molecules become miscleaved. Because these molecules will be locked into F1 and unable to fold shift, we excluded PR-cleaved Bn-AFF-67 variants from further study.

**Materials and Methods. Protein expression and purification.** WT Bn, F1 and F2 analogs, and Bn-AFF variants were coexpressed with barstar in *E. coli* BL21(DE3) at 20 °C. These proteins were soluble and were purified as described (2). Bn-AFF-67 variants were expressed in inclusion bodies (37 °C) and were purified as follows. Cells were lysed and centrifuged, and the supernatant discarded. Pellets were washed repeatedly with 20 mM Tris (pH 7.5), 1 mM EDTA and the same buffer containing 0.5 M NaCl. Pellets were then dissolved in 9 M urea, 20 mM Tris (pH 7.5) to dissociate the Bn-AFF-67/barstar complex. The solution was passed through a DE52 column (Whatman) to remove barstar. The flow through was then dialyzed against double-distilled water and lyophilized. Proteins were judged to be approximately 95% pure by SDS-PAGE.

**Thermal denaturation experiments.** Protein samples were prepared as described in the text. Thermal denaturation curves for Bn-F1 (3.6  $\mu\text{M}$ ), Bn-F2(P94) (6.7  $\mu\text{M}$ ), and PR-cleaved Bn-F1 (10  $\mu\text{M}$ ) were monitored by CD signal at 230 nm. Thermal denaturation of PR-cleaved Bn-F1 (1  $\mu\text{M}$ ) was monitored by Trp fluorescence because CD signal is too weak at that protein concentration. Unfolding was tracked by the change in the wavelength of maximum emission ( $F_{\text{max}}$ ).  $F_{\text{max}}$  changes from 335 nm in native Bn to 355 nm in unfolded Bn (3).  $F_{\text{max}}$  values were obtained by fitting emission spectra using the Datamax software package (Horiba/Jobin-Yvon).  $T_m$  values were calculated by fitting the data to the two-state unfolding model.

1. Kontijevskis A, Wikberg JE, & Komorowski J (2007) Computational proteomics analysis of HIV-1 protease interactome. *Proteins* 68(1):305–312.  
2. Cutler T, Mills BM, Lubin DJ, Chong LT, & Loh SN (2009) Effect of interdomain linker length on an antagonistic folding-unfolding equilibrium between two protein domains. *J Mol Biol* 386:854–868.

3. Radley TL, Markowska AI, Bettinger BT, Ha J-H, & Loh SN (2003) Allosteric switching by mutually exclusive folding of protein domains. *J Mol Biol* 332:529–536.



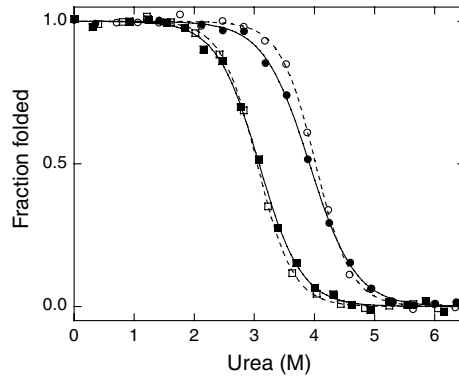

**Fig. S4.** Urea-induced denaturation of Bn-AFF-67 and associated variants, monitored by Trp fluorescence and normalized to fraction folded. Symbols are as follows: Bn-F1-67 (Open Circles), Bn-AFF-67 (Closed Circles), Bn-F2-67 (Open Squares), Bn-AFF-67(K94) (Closed Squares).

**Table S1. Thermodynamic parameters of Bn-AFF-67 and associated variants. Errors are standard deviations of at least three measurements.**

| F1 or F2 analog | $\Delta G^{\text{H}_2\text{O}}$ (kcal/mol) | $m$ (kcal/mol/M) | $C_m$ (M)      |
|-----------------|--------------------------------------------|------------------|----------------|
| WT Bn           | $8.4 \pm 0.8$                              | $1.8 \pm 0.2$    | $4.8 \pm 0.02$ |
| Bn-F1-67        | $6.4 \pm 0.4$                              | $1.6 \pm 0.1$    | $3.9 \pm 0.03$ |
| Bn-F2-67        | $5.3 \pm 0.4$                              | $1.8 \pm 0.1$    | $3.0 \pm 0.03$ |
| Bn-F1-67(K94)   | $4.8 \pm 0.08$                             | $2.1 \pm 0.03$   | $2.3 \pm 0.01$ |
| Bn-F2-67(K94)   | $3.2 \pm 0.1$                              | $2.2 \pm 0.04$   | $1.5 \pm 0.03$ |
| AFF variant     | $\Delta G^{\text{H}_2\text{O}}$ (kcal/mol) | $m$ (kcal/mol/M) | $C_m$ (M)      |
| Bn-AFF-67       | $6.2 \pm 0.7$                              | $1.6 \pm 0.1$    | $3.9 \pm 0.14$ |
| Bn-AFF-67(K94)  | $4.9 \pm 0.07$                             | $1.6 \pm 0.03$   | $3.1 \pm 0.02$ |
| Bn-AFF-67(K94') | $9.1 \pm 1.2$                              | $2.3 \pm 0.3$    | $4.0 \pm 0.04$ |
